# Supplementary material for: SARS-CoV-2 ORF6 disrupts nucleocytoplasmic trafficking to advance viral replication
Source: PubMed Central journal article supplement (PMC9120032; doi:10.1038/s42003-022-03427-4), 2022-05-19
Supplement: 42003_2022_3427_MOESM3_ESM.pdf [file 42003_2022_3427_MOESM3_ESM.pdf]

## Description of Additional Supplementary Files

**File name:** Supplementary Data 1

**Description:** The source data behind the graphs in the main figures.
